# Supplementary material for: Can Electrochemical Sensors Be Used for Identification and Phylogenetic Studies in Lamiaceae?
Source: MDPI journal article supplement (doi:10.3390/s21248216), 2021-12-08
Supplement: s1 [file s1]

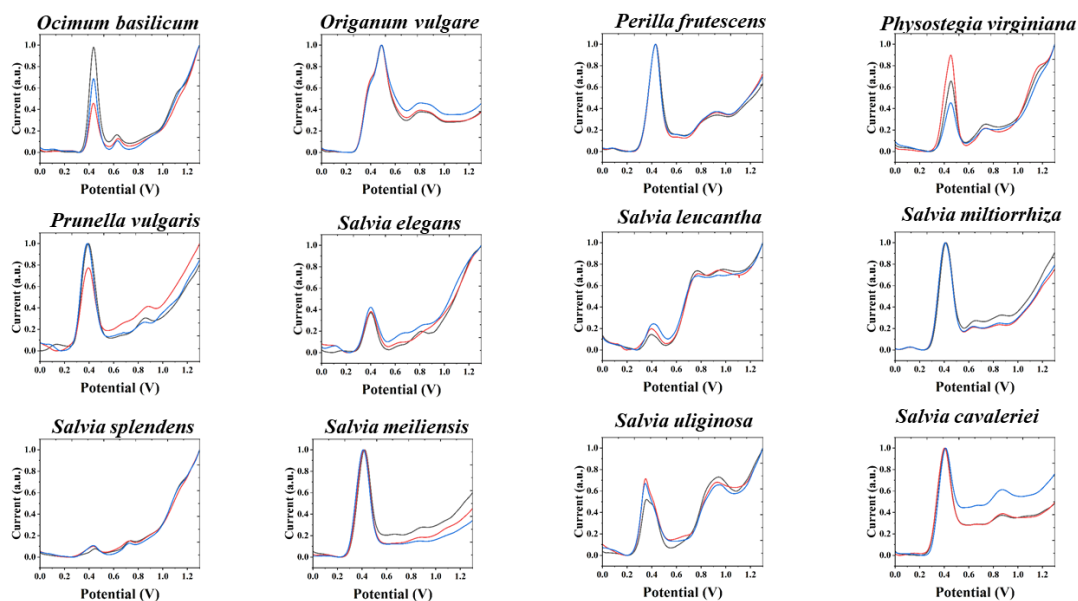

**Figure S1.** Electrochemical fingerprint of *Ocimum basilicum*, *Origanum vulgare*, *Perilla frutescens*, *Physostegia virginiana*, *Prunella vulgaris*, *Salvia elegans*, *Salvia leucantha*, *Salvia miltiorrhiza*, *Salvia splendens*, *Salvia meliensis*, *Salvia uliginosa*, *Salvia cavaleriei* after water extraction and recorded under PBS condition.

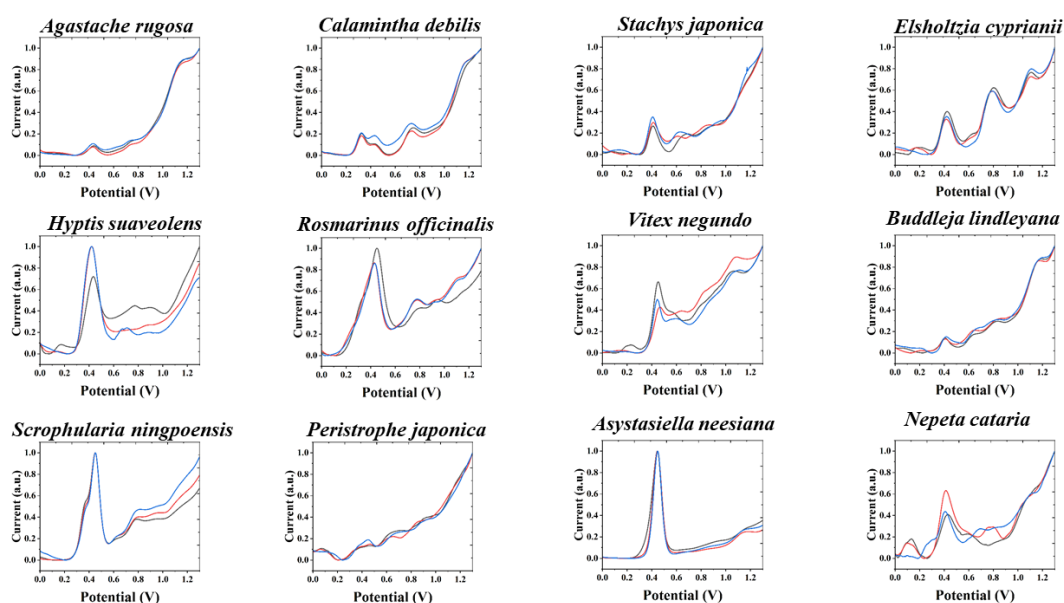

**Figure S2.** Electrochemical fingerprint of *Agastache rugosa*, *Calamintha debilis*, *Stachys japonica*, *Elsholtzia cyprianii*, *Hyptis suaveolens*, *Rosmarinus officinalis*, *Vitex negundo*, *Buddleja lindleyana*, *Scrophularia ningpoensis*, *Peristrophe japonica*, *Asystasiella neesiana*, *Nepeta cataria* after water extraction and recorded under PBS condition.

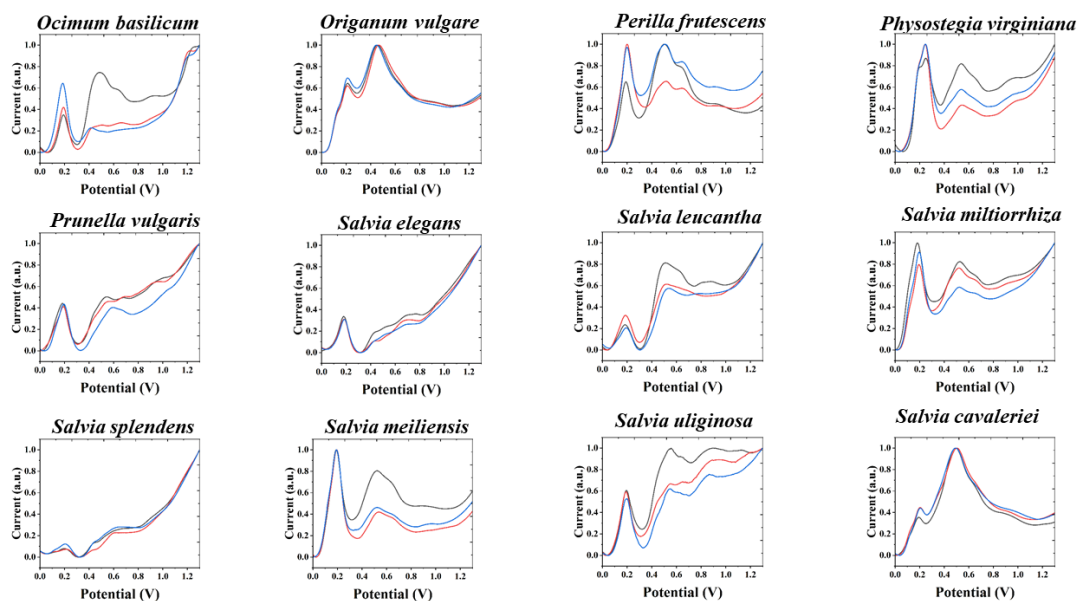

**Figure S3.** Electrochemical fingerprint of *Ocimum basilicum*, *Origanum vulgare*, *Perilla frutescens*, *Physostegia virginiana*, *Prunella vulgaris*, *Salvia elegans*, *Salvia leucantha*, *Salvia miltiorrhiza*, *Salvia splendens*, *Salvia meliensis*, *Salvia uliginosa*, *Salvia cavaleriei* after ethanol extraction and recorded under ABS condition.

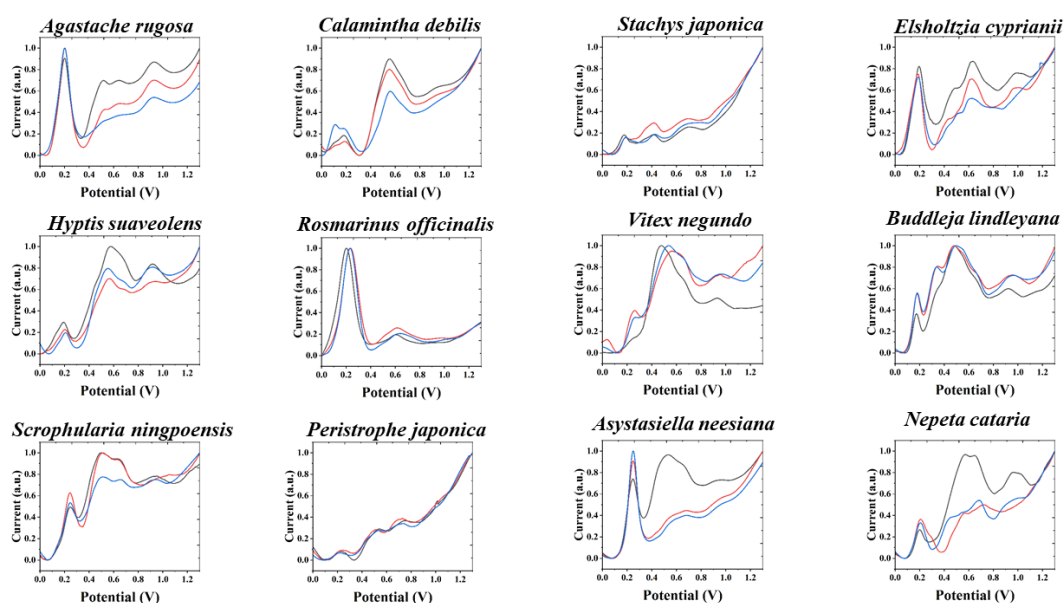

**Figure S4.** Electrochemical fingerprint of *Agastache rugosa*, *Calamintha debilis*, *Stachys japonica*, *Elsholtzia cyprianii*, *Hyptis suaveolens*, *Rosmarinus officinalis*, *Vitex negundo*, *Buddleja lindleyana*, *Scrophularia ningpoensis*, *Peristrophe japonica*, *Asystasiella neesiana*, *Nepeta cataria* after ethanol extraction and recorded under ABS condition.

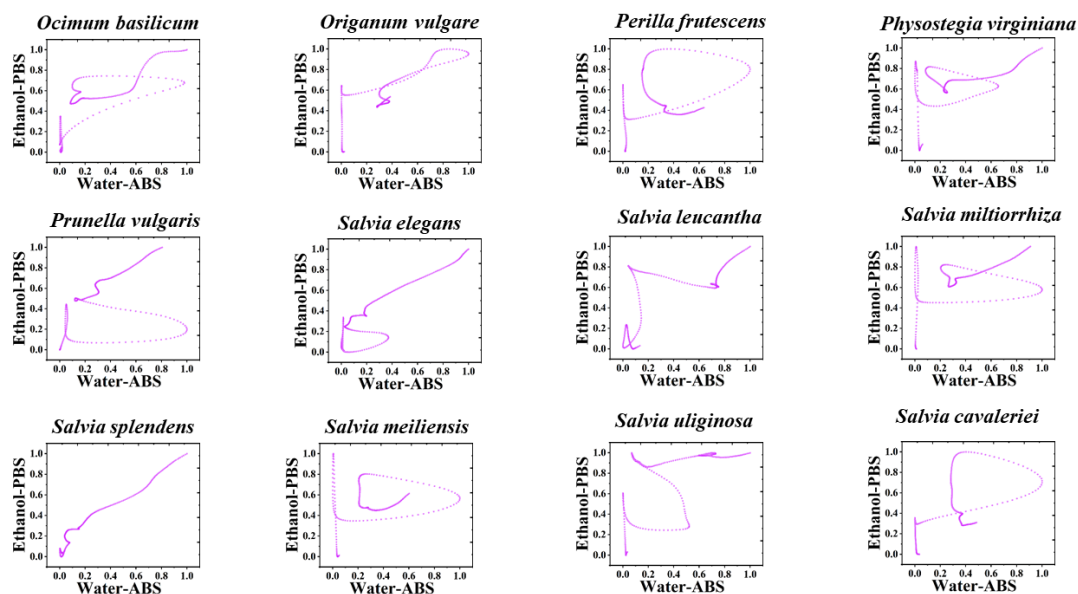

**Figure S5.** Scatter plots of *Ocimum basilicum*, *Origanum vulgare*, *Perilla frutescens*, *Physostegia virginiana*, *Prunella vulgaris*, *Salvia elegans*, *Salvia leucantha*, *Salvia miltiorrhiza*, *Salvia splendens*, *Salvia meiliensis*, *Salvia uliginosa*, *Salvia cavaleriei* combining the signals collected under PBS for the water extracts and under ABS for the ethanol extracts.

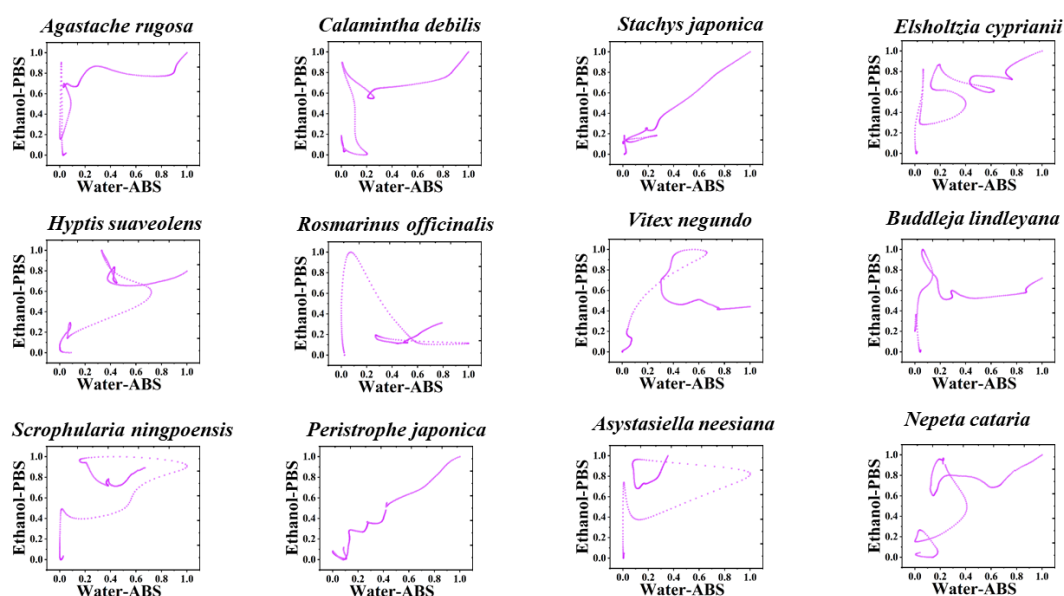

**Figure S6.** Scatter plots of *Agastache rugosa*, *Calamintha debilis*, *Stachys japonica*, *Elsholtzia cyprianii*, *Hyptis suaveolens*, *Rosmarinus officinalis*, *Vitex negundo*, *Buddleja lindleyana*, *Scrophularia ningpoensis*, *Peristrophe japonica*, *Asystasiella neesiana*, *Nepeta cataria* combining the signals collected under PBS for the water extracts and under ABS for the ethanol extracts.

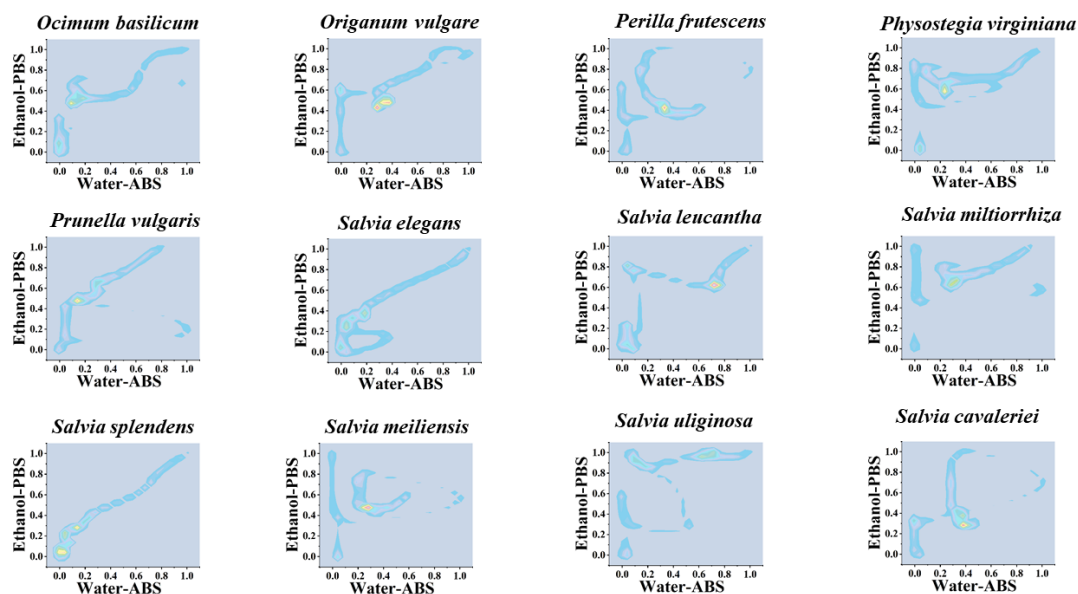

**Figure S7.** 2D density map of *Ocimum basilicum*, *Origanum vulgare*, *Perilla frutescens*, *Physostegia virginiana*, *Prunella vulgaris*, *Salvia elegans*, *Salvia leucantha*, *Salvia miltiorrhiza*, *Salvia splendens*, *Salvia meiliensis*, *Salvia uliginosa*, *Salvia cavaleriei* combining the signals collected under PBS for the water extracts and under ABS for the ethanol extracts.

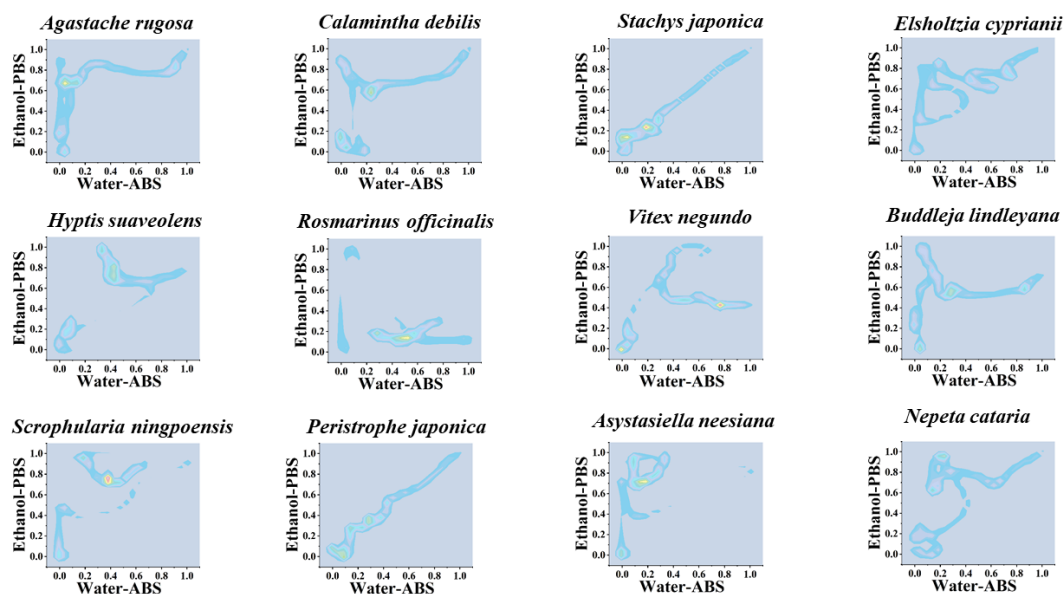

**Figure S8.** 2D density map of *Agastache rugosa*, *Calamintha debilis*, *Stachys japonica*, *Elsholtzia cyprianii*, *Hyptis suaveolens*, *Rosmarinus officinalis*, *Vitex negundo*, *Buddleja lindleyana*, *Scrophularia ningpoensis*, *Peristrophe japonica*, *Asystasiella neesiana*, *Nepeta cataria* combining the signals collected under PBS for the water extracts and under ABS for the ethanol extracts.

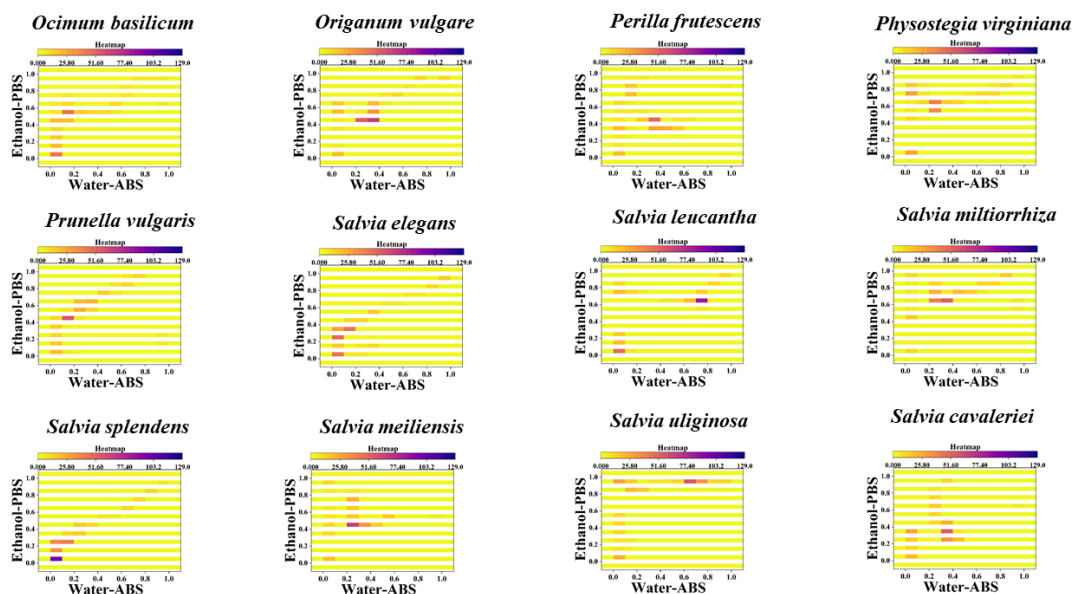

**Figure S9.** Heatmap of *Ocimum basilicum*, *Origanum vulgare*, *Perilla frutescens*, *Physostegia virginiana*, *Prunella vulgaris*, *Salvia elegans*, *Salvia leucantha*, *Salvia miltiorrhiza*, *Salvia splendens*, *Salvia meliensis*, *Salvia uliginosa*, *Salvia cavaleriei* combining the signals collected under PBS for the water extracts and under ABS for the ethanol extracts.

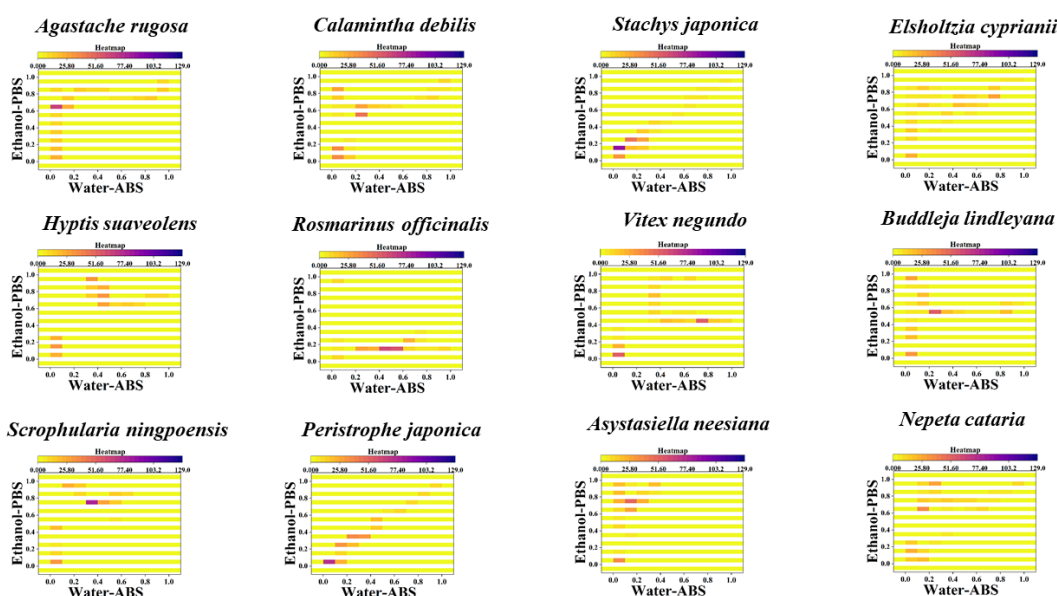

**Figure S10.** Heatmap of *Agastache rugosa*, *Calamintha debilis*, *Stachys japonica*, *Elsholtzia cyprianii*, *Hyptis suaveolens*, *Rosmarinus officinalis*, *Vitex negundo*, *Buddlejia lindleyana*, *Scrophularia ningpoensis*, *Peristrophe japonica*, *Asystasiella neesiana*, *Nepeta cataria* combining the signals collected under PBS for the water extracts and under ABS for the ethanol extracts.
